# Supplementary material for: Highly porous α-alumina powders prepared with the self-assembly of an asymmetric PS-b-PEO diblock copolymer
Source: Royal Society of Chemistry journal article supplement (doi:10.1039/c9cc04703d), 2019-01-01
Supplement: c9cc04703d1.pdf [file c9cc04703d1.pdf]

## Supporting Information

### Highly porous $\alpha$ -alumina powders prepared with the self-assembly of an asymmetric PS-*b*-PEO diblock copolymer

Tatsuo Kimura\* and Hirokazu Maruoka

National Institute of Advanced Industrial Science and Technology (AIST),  
Shimoshidami, Moriyama-ku, Nagoya 463-8560, Japan.

E-mail: t-kimura@aist.go.jp

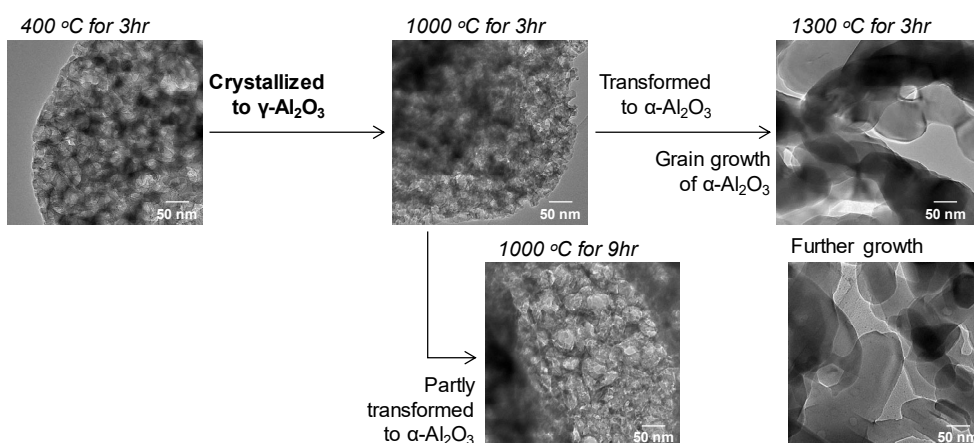

**Fig. S1** TEM images of aerosol-assisted alumina powders obtained with the self-assembly of PS<sub>35000</sub>-*b*-PEO<sub>17000</sub> followed by calcination at 400 °C, 1000 °C and 1300 °C.

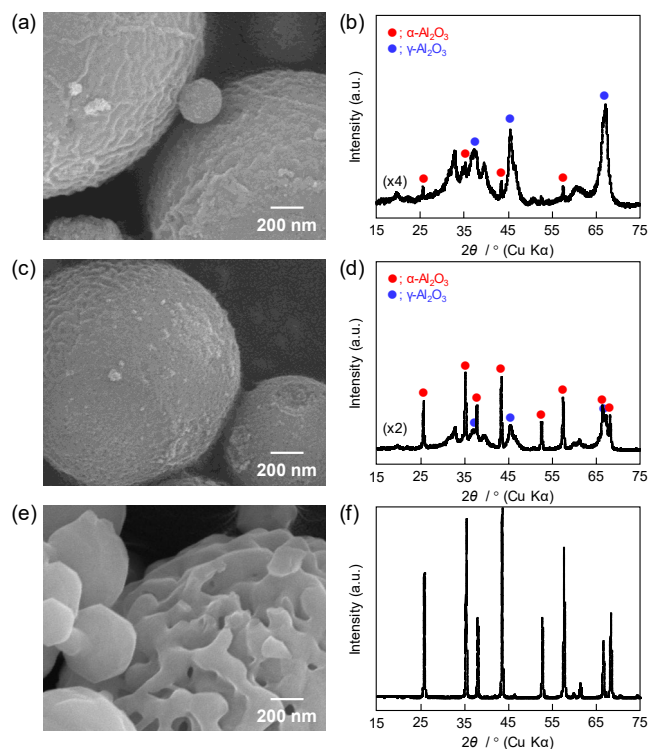

**Fig. S2** (a, c, e) SEM images and (b, d, f) XRD patterns of aerosol-assisted  $\text{Al}_2\text{O}_3$  powders obtained using Pluronic P123 followed by calcination at (a, b) 1000 °C for 3 hr, (c, d) 1000 °C for 9 hr and (e, f) 1300 °C for 3 hr.

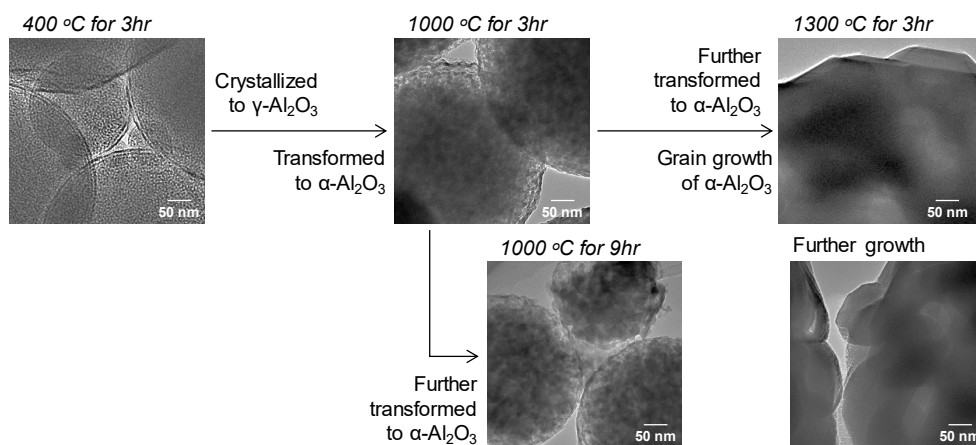

**Fig. S3** TEM images of aerosol-assisted alumina powders obtained with the self-assembly of Pluronic P123 followed by calcination at 400 °C, 1000 °C and 1300 °C.

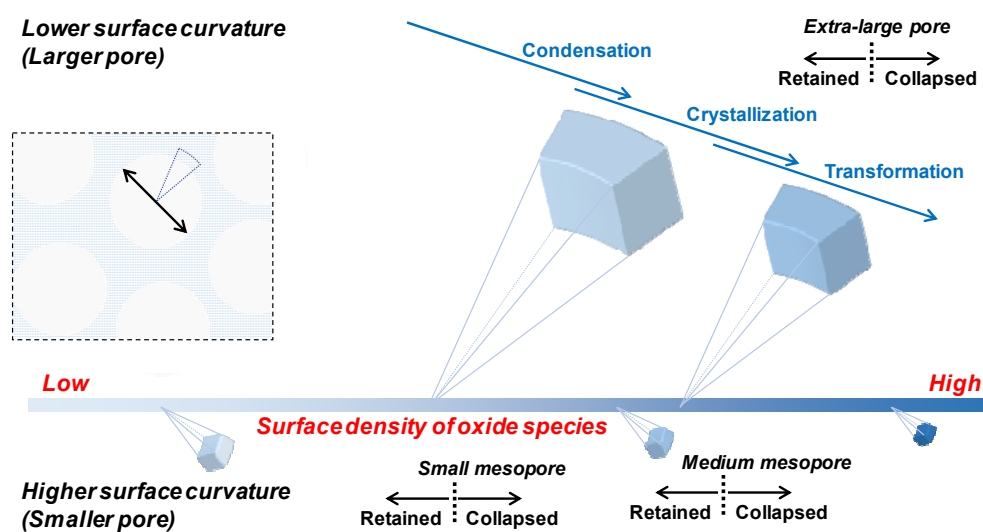

**Fig. S4** Variation in surface density with condensation, crystallization and transformation in frameworks starting from sol-gel derivative amorphous metal oxide species by considering the surface curvature of various surfactant-assisted pores.
